# Supplementary material for: Financing Strategies to Facilitate Access to High-Cost Anticancer Drugs: A Systematic Review of the Literature
Source: PubMed Central journal article supplement (PMC9808218; doi:10.34172/ijhpm.2021.138), 2021-09-22
Supplement: ijhpm-11-1625-s003.pdf [file ijhpm-11-1625-s003.pdf]

**Article title:** Financing Strategies to Facilitate Access to High-Cost Anticancer Drugs: A Systematic Review of the Literature

**Journal name:** International Journal of Health Policy and Management (IJHPM)

**Authors' information:** Chanthawat Patikorn<sup>1</sup>, Suthira Taychakhoonavudh<sup>1</sup>, Rungpetch Sakulbumrungsil<sup>1</sup>, Dennis Ross-Degnan<sup>2</sup>, Puree Anantachoti<sup>1\*</sup>

<sup>1</sup>Department of Social and Administrative Pharmacy, Faculty of Pharmaceutical Sciences, Chulalongkorn University, Bangkok, Thailand.

<sup>2</sup>Department of Population Medicine, Harvard Medical School and Harvard Pilgrim Health Care

Institute, Landmark Center, Boston, MA, USA.

(\*Corresponding author: [puree.a@chula.ac.th](mailto:puree.a@chula.ac.th))

**Supplementary file 3.** Strategies to Facilitate Access to High-Cost Anticancer Drugs by Country

| Country                      | Standard pharmaceutical reimbursement and pricing policies |                                       |                           | Funding strategies specific to high-cost drugs |                                     |                           |                                       |                             | Financial assistance for individual patients |                                          |                            |                        |
|------------------------------|------------------------------------------------------------|---------------------------------------|---------------------------|------------------------------------------------|-------------------------------------|---------------------------|---------------------------------------|-----------------------------|----------------------------------------------|------------------------------------------|----------------------------|------------------------|
|                              | WHO List of essential medicines                            | National Health Technology Assessment | Reference pricing systems | Managed entry agreement                        | Dedicated funds for high-cost drugs | Orphan drug reimbursement | Adjusted cost-effectiveness threshold | Use of compulsory licensing | Health insurance scheme for the poor         | Patient cost-sharing reduction/exemption | Patient Assistance Program | Assistance Foundations |
| <b>High-income countries</b> |                                                            |                                       |                           |                                                |                                     |                           |                                       |                             |                                              |                                          |                            |                        |
| Antigua and Barbuda          | /                                                          |                                       |                           |                                                |                                     |                           |                                       |                             |                                              |                                          |                            |                        |
| Australia                    |                                                            | /                                     | /                         | /                                              | /                                   | /                         | /                                     |                             |                                              |                                          | /                          |                        |

| Country        | Standard pharmaceutical reimbursement and pricing policies |                                       |                           | Funding strategies specific to high-cost drugs |                                     |                           |                                       |                             | Financial assistance for individual patients |                                          |                            |                        |
|----------------|------------------------------------------------------------|---------------------------------------|---------------------------|------------------------------------------------|-------------------------------------|---------------------------|---------------------------------------|-----------------------------|----------------------------------------------|------------------------------------------|----------------------------|------------------------|
|                | WHO List of essential medicines                            | National Health Technology Assessment | Reference pricing systems | Managed entry agreement                        | Dedicated funds for high-cost drugs | Orphan drug reimbursement | Adjusted cost-effectiveness threshold | Use of compulsory licensing | Health insurance scheme for the poor         | Patient cost-sharing reduction/exemption | Patient Assistance Program | Assistance Foundations |
| Austria        |                                                            | /                                     |                           | /                                              |                                     |                           |                                       |                             |                                              |                                          |                            |                        |
| Bahamas        |                                                            |                                       |                           |                                                |                                     |                           |                                       |                             |                                              | /                                        |                            |                        |
| Bahrain        | /                                                          |                                       |                           |                                                |                                     |                           |                                       |                             |                                              |                                          |                            |                        |
| Barbados       | /                                                          |                                       |                           |                                                |                                     |                           |                                       |                             |                                              | /                                        |                            |                        |
| Belgium        |                                                            | /                                     | /                         | /                                              | /                                   |                           |                                       |                             |                                              |                                          |                            |                        |
| Canada         |                                                            | /                                     |                           | /                                              | /                                   |                           |                                       |                             |                                              | /                                        |                            |                        |
| Chile          | /                                                          | /                                     |                           |                                                | /                                   |                           |                                       |                             |                                              | /                                        |                            |                        |
| Croatia        | /                                                          | /                                     | /                         | /                                              |                                     | /                         |                                       |                             | /                                            |                                          |                            |                        |
| Czech Republic | /                                                          | /                                     | /                         | /                                              |                                     |                           |                                       |                             |                                              |                                          |                            |                        |
| Denmark        |                                                            | /                                     | /                         |                                                | /                                   |                           |                                       |                             |                                              |                                          |                            |                        |
| Estonia        | /                                                          | /                                     | /                         | /                                              |                                     |                           |                                       |                             |                                              |                                          |                            |                        |
| Finland        |                                                            | /                                     | /                         | /                                              |                                     |                           |                                       |                             |                                              |                                          |                            |                        |
| France         |                                                            | /                                     | /                         | /                                              | /                                   | /                         |                                       |                             | /                                            |                                          |                            |                        |
| Germany        |                                                            | /                                     | /                         | /                                              |                                     | /                         |                                       |                             |                                              |                                          |                            |                        |
| Greece         |                                                            | /                                     |                           |                                                | /                                   |                           |                                       |                             |                                              |                                          |                            |                        |

| Country     | Standard pharmaceutical reimbursement and pricing policies |                                       |                           | Funding strategies specific to high-cost drugs |                                     |                           |                                       |                             | Financial assistance for individual patients |                                          |                            |                        |
|-------------|------------------------------------------------------------|---------------------------------------|---------------------------|------------------------------------------------|-------------------------------------|---------------------------|---------------------------------------|-----------------------------|----------------------------------------------|------------------------------------------|----------------------------|------------------------|
|             | WHO List of essential medicines                            | National Health Technology Assessment | Reference pricing systems | Managed entry agreement                        | Dedicated funds for high-cost drugs | Orphan drug reimbursement | Adjusted cost-effectiveness threshold | Use of compulsory licensing | Health insurance scheme for the poor         | Patient cost-sharing reduction/exemption | Patient Assistance Program | Assistance Foundations |
| Hong Kong   |                                                            | /                                     |                           |                                                | /                                   |                           |                                       |                             |                                              |                                          | /                          |                        |
| Hungary     |                                                            | /                                     | /                         | /                                              |                                     | /                         |                                       |                             |                                              |                                          |                            |                        |
| Iceland     |                                                            | /                                     | /                         |                                                |                                     |                           |                                       |                             |                                              |                                          |                            |                        |
| Ireland     |                                                            | /                                     | /                         |                                                |                                     |                           |                                       |                             |                                              |                                          |                            |                        |
| Israel      |                                                            | /                                     | /                         | /                                              |                                     |                           |                                       |                             |                                              |                                          |                            |                        |
| Italy       |                                                            | /                                     | /                         | /                                              | /                                   |                           | /                                     |                             |                                              |                                          |                            |                        |
| South Korea | /                                                          | /                                     | /                         | /                                              |                                     | /                         | /                                     |                             |                                              | /                                        |                            |                        |
| Latvia      | /                                                          | /                                     | /                         | /                                              | /                                   | /                         |                                       |                             |                                              |                                          |                            |                        |
| Lithuania   | /                                                          | /                                     | /                         | /                                              |                                     | /                         |                                       |                             |                                              |                                          |                            |                        |
| Luxembourg  |                                                            | /                                     |                           | /                                              |                                     |                           |                                       |                             |                                              |                                          |                            |                        |
| Malta       | /                                                          | /                                     |                           | /                                              |                                     |                           |                                       |                             |                                              |                                          |                            |                        |
| Mauritius   |                                                            |                                       |                           |                                                |                                     |                           |                                       |                             |                                              | /                                        |                            |                        |
| Monaco      |                                                            | /                                     |                           |                                                |                                     |                           |                                       |                             |                                              |                                          |                            |                        |
| Nauru       | /                                                          |                                       |                           |                                                |                                     |                           |                                       |                             |                                              |                                          |                            |                        |
| Netherlands |                                                            | /                                     | /                         | /                                              | /                                   | /                         | /                                     |                             | /                                            |                                          |                            |                        |

| Country             | Standard pharmaceutical reimbursement and pricing policies |                                       |                           | Funding strategies specific to high-cost drugs |                                     |                           |                                       |                             | Financial assistance for individual patients |                                          |                            |                        |
|---------------------|------------------------------------------------------------|---------------------------------------|---------------------------|------------------------------------------------|-------------------------------------|---------------------------|---------------------------------------|-----------------------------|----------------------------------------------|------------------------------------------|----------------------------|------------------------|
|                     | WHO List of essential medicines                            | National Health Technology Assessment | Reference pricing systems | Managed entry agreement                        | Dedicated funds for high-cost drugs | Orphan drug reimbursement | Adjusted cost-effectiveness threshold | Use of compulsory licensing | Health insurance scheme for the poor         | Patient cost-sharing reduction/exemption | Patient Assistance Program | Assistance Foundations |
| New Zealand         |                                                            | /                                     |                           | /                                              |                                     |                           |                                       |                             |                                              | /                                        |                            |                        |
| Norway              |                                                            | /                                     | /                         | /                                              |                                     |                           |                                       |                             |                                              |                                          |                            |                        |
| Oman                | /                                                          |                                       |                           |                                                |                                     |                           |                                       |                             |                                              |                                          |                            |                        |
| Palau               | /                                                          |                                       |                           |                                                |                                     |                           |                                       |                             |                                              |                                          |                            |                        |
| Panama              |                                                            |                                       |                           |                                                |                                     |                           |                                       |                             |                                              | /                                        |                            |                        |
| Poland              | /                                                          | /                                     | /                         | /                                              | /                                   | /                         |                                       |                             |                                              |                                          |                            |                        |
| Portugal            | /                                                          | /                                     | /                         | /                                              |                                     |                           |                                       |                             |                                              |                                          |                            |                        |
| Romania             | /                                                          | /                                     | /                         | /                                              |                                     | /                         |                                       |                             |                                              |                                          |                            |                        |
| Seychelles          | /                                                          |                                       |                           |                                                |                                     |                           |                                       |                             |                                              | /                                        |                            |                        |
| Singapore           |                                                            | /                                     |                           |                                                |                                     | /                         |                                       |                             |                                              | /                                        |                            |                        |
| Slovakia            | /                                                          | /                                     | /                         |                                                | /                                   | /                         | /                                     |                             |                                              |                                          |                            |                        |
| Slovenia            | /                                                          | /                                     | /                         | /                                              |                                     |                           |                                       |                             |                                              |                                          |                            |                        |
| Spain               |                                                            | /                                     | /                         | /                                              |                                     |                           |                                       |                             |                                              |                                          |                            |                        |
| St. Kitts and Nevis | /                                                          |                                       |                           |                                                |                                     |                           |                                       |                             |                                              |                                          |                            |                        |
| Sweden              | /                                                          | /                                     | /                         | /                                              | /                                   |                           | /                                     |                             |                                              |                                          |                            |                        |

| Country                              | Standard pharmaceutical reimbursement and pricing policies |                                       |                           | Funding strategies specific to high-cost drugs |                                     |                           |                                       |                             | Financial assistance for individual patients |                                          |                            |                        |
|--------------------------------------|------------------------------------------------------------|---------------------------------------|---------------------------|------------------------------------------------|-------------------------------------|---------------------------|---------------------------------------|-----------------------------|----------------------------------------------|------------------------------------------|----------------------------|------------------------|
|                                      | WHO List of essential medicines                            | National Health Technology Assessment | Reference pricing systems | Managed entry agreement                        | Dedicated funds for high-cost drugs | Orphan drug reimbursement | Adjusted cost-effectiveness threshold | Use of compulsory licensing | Health insurance scheme for the poor         | Patient cost-sharing reduction/exemption | Patient Assistance Program | Assistance Foundations |
| Switzerland                          |                                                            | /                                     |                           | /                                              |                                     |                           |                                       |                             |                                              |                                          |                            |                        |
| Taiwan                               |                                                            | /                                     |                           | /                                              | /                                   | /                         |                                       |                             |                                              |                                          |                            |                        |
| Trinidad and Tobago                  | /                                                          |                                       |                           |                                                |                                     |                           |                                       |                             |                                              |                                          |                            |                        |
| United Kingdom                       |                                                            | /                                     |                           | /                                              | /                                   | /                         | /                                     |                             |                                              |                                          |                            |                        |
| United States                        |                                                            |                                       |                           | /                                              | /                                   | /                         |                                       | /                           | /                                            | /                                        | /                          | /                      |
| Uruguay                              | /                                                          | /                                     |                           |                                                | /                                   |                           |                                       |                             |                                              | /                                        |                            |                        |
| <b>Upper middle-income countries</b> |                                                            |                                       |                           |                                                |                                     |                           |                                       |                             |                                              |                                          |                            |                        |
| Albania                              |                                                            |                                       | /                         |                                                |                                     |                           |                                       |                             |                                              |                                          | /                          |                        |
| Argentina                            | /                                                          | /                                     |                           |                                                |                                     |                           |                                       |                             |                                              |                                          | /                          |                        |
| Armenia                              | /                                                          |                                       |                           |                                                |                                     |                           |                                       |                             |                                              |                                          | /                          |                        |
| Azerbaijan                           |                                                            |                                       |                           |                                                |                                     |                           |                                       |                             |                                              |                                          | /                          |                        |
| Belarus                              | /                                                          | /                                     |                           |                                                |                                     |                           |                                       |                             |                                              |                                          | /                          |                        |
| Belize                               | /                                                          |                                       |                           |                                                |                                     |                           |                                       |                             |                                              |                                          |                            |                        |
| Bosnia and Herzegovina               | /                                                          | /                                     |                           | /                                              | /                                   |                           |                                       |                             |                                              |                                          |                            |                        |
| Botswana                             | /                                                          |                                       |                           |                                                |                                     |                           |                                       |                             |                                              |                                          | /                          |                        |

| Country            | Standard pharmaceutical reimbursement and pricing policies |                                       |                           | Funding strategies specific to high-cost drugs |                                     |                           |                                       |                             | Financial assistance for individual patients |                                          |                            |                        |
|--------------------|------------------------------------------------------------|---------------------------------------|---------------------------|------------------------------------------------|-------------------------------------|---------------------------|---------------------------------------|-----------------------------|----------------------------------------------|------------------------------------------|----------------------------|------------------------|
|                    | WHO List of essential medicines                            | National Health Technology Assessment | Reference pricing systems | Managed entry agreement                        | Dedicated funds for high-cost drugs | Orphan drug reimbursement | Adjusted cost-effectiveness threshold | Use of compulsory licensing | Health insurance scheme for the poor         | Patient cost-sharing reduction/exemption | Patient Assistance Program | Assistance Foundations |
| Brazil             | /                                                          | /                                     |                           | /                                              |                                     |                           |                                       |                             |                                              |                                          |                            |                        |
| Bulgaria           | /                                                          | /                                     | /                         | /                                              |                                     |                           |                                       |                             |                                              |                                          |                            |                        |
| China              | /                                                          | /                                     |                           | /                                              |                                     |                           |                                       | /                           | /                                            | /                                        |                            |                        |
| Colombia           | /                                                          | /                                     |                           |                                                |                                     |                           |                                       |                             |                                              | /                                        |                            |                        |
| Costa Rica         | /                                                          |                                       |                           |                                                |                                     |                           |                                       |                             |                                              | /                                        |                            |                        |
| Cuba               | /                                                          |                                       |                           |                                                |                                     |                           |                                       |                             |                                              |                                          |                            |                        |
| Dominica           | /                                                          |                                       |                           |                                                |                                     |                           |                                       |                             |                                              |                                          |                            |                        |
| Dominican Republic | /                                                          |                                       |                           |                                                |                                     |                           |                                       |                             |                                              | /                                        |                            |                        |
| Ecuador            | /                                                          | /                                     |                           |                                                |                                     |                           |                                       |                             |                                              | /                                        |                            |                        |
| Fiji               | /                                                          |                                       |                           |                                                |                                     |                           |                                       |                             |                                              | /                                        |                            |                        |
| Gabon              | /                                                          |                                       |                           |                                                |                                     |                           |                                       |                             |                                              | /                                        |                            |                        |
| Georgia            | /                                                          |                                       |                           |                                                |                                     |                           |                                       |                             |                                              | /                                        |                            |                        |
| Grenada            | /                                                          |                                       |                           |                                                |                                     |                           |                                       |                             |                                              |                                          |                            |                        |
| Guatemala          |                                                            |                                       |                           |                                                |                                     |                           |                                       |                             |                                              | /                                        |                            |                        |
| Guyana             | /                                                          |                                       |                           |                                                |                                     |                           |                                       |                             |                                              |                                          |                            |                        |

| Country          | Standard pharmaceutical reimbursement and pricing policies |                                       |                           | Funding strategies specific to high-cost drugs |                                     |                           |                                       |                             | Financial assistance for individual patients |                                          |                            |                        |
|------------------|------------------------------------------------------------|---------------------------------------|---------------------------|------------------------------------------------|-------------------------------------|---------------------------|---------------------------------------|-----------------------------|----------------------------------------------|------------------------------------------|----------------------------|------------------------|
|                  | WHO List of essential medicines                            | National Health Technology Assessment | Reference pricing systems | Managed entry agreement                        | Dedicated funds for high-cost drugs | Orphan drug reimbursement | Adjusted cost-effectiveness threshold | Use of compulsory licensing | Health insurance scheme for the poor         | Patient cost-sharing reduction/exemption | Patient Assistance Program | Assistance Foundations |
| Indonesia        | /                                                          | /                                     |                           |                                                |                                     |                           |                                       |                             |                                              | /                                        |                            |                        |
| Iran             | /                                                          | /                                     |                           |                                                |                                     |                           |                                       |                             | /                                            |                                          |                            |                        |
| Iraq             | /                                                          |                                       |                           |                                                |                                     |                           |                                       |                             |                                              |                                          |                            |                        |
| Jamaica          | /                                                          |                                       |                           |                                                | /                                   |                           |                                       |                             |                                              | /                                        |                            |                        |
| Jordan           | /                                                          | /                                     |                           |                                                |                                     |                           |                                       |                             |                                              |                                          |                            |                        |
| Kazakhstan       |                                                            | /                                     |                           |                                                | /                                   | /                         |                                       |                             |                                              | /                                        |                            |                        |
| Lebanon          | /                                                          |                                       |                           |                                                |                                     |                           |                                       |                             |                                              |                                          |                            |                        |
| Macedonia        | /                                                          | /                                     |                           |                                                |                                     |                           |                                       |                             |                                              |                                          |                            |                        |
| Malaysia         | /                                                          | /                                     |                           |                                                |                                     |                           |                                       |                             |                                              | /                                        |                            |                        |
| Maldives         | /                                                          |                                       |                           |                                                |                                     |                           |                                       |                             |                                              |                                          |                            |                        |
| Marshall Islands | /                                                          |                                       |                           |                                                |                                     |                           |                                       |                             |                                              |                                          |                            |                        |
| Mexico           | /                                                          | /                                     | /                         |                                                | /                                   |                           |                                       | /                           |                                              | /                                        |                            |                        |
| Montenegro       | /                                                          |                                       |                           |                                                |                                     |                           |                                       |                             |                                              |                                          |                            |                        |
| Namibia          | /                                                          |                                       |                           |                                                |                                     |                           |                                       |                             |                                              | /                                        |                            |                        |
| Paraguay         | /                                                          |                                       |                           |                                                |                                     |                           |                                       |                             |                                              | /                                        |                            |                        |

| Country                              | Standard pharmaceutical reimbursement and pricing policies |                                       |                           | Funding strategies specific to high-cost drugs |                                     |                           |                                       |                             | Financial assistance for individual patients |                                          |                            |                        |
|--------------------------------------|------------------------------------------------------------|---------------------------------------|---------------------------|------------------------------------------------|-------------------------------------|---------------------------|---------------------------------------|-----------------------------|----------------------------------------------|------------------------------------------|----------------------------|------------------------|
|                                      | WHO List of essential medicines                            | National Health Technology Assessment | Reference pricing systems | Managed entry agreement                        | Dedicated funds for high-cost drugs | Orphan drug reimbursement | Adjusted cost-effectiveness threshold | Use of compulsory licensing | Health insurance scheme for the poor         | Patient cost-sharing reduction/exemption | Patient Assistance Program | Assistance Foundations |
| Peru                                 | /                                                          |                                       |                           |                                                |                                     |                           |                                       |                             |                                              | /                                        |                            |                        |
| Russia                               | /                                                          | /                                     | /                         |                                                | /                                   | /                         |                                       | /                           |                                              | /                                        |                            |                        |
| Serbia                               | /                                                          | /                                     |                           | /                                              |                                     |                           |                                       |                             |                                              |                                          |                            |                        |
| South Africa                         | /                                                          | /                                     |                           |                                                |                                     |                           |                                       |                             |                                              | /                                        |                            |                        |
| St. Lucia                            | /                                                          |                                       |                           |                                                |                                     |                           |                                       |                             |                                              | /                                        |                            |                        |
| St. Vincent and the Grenadines       | /                                                          |                                       |                           |                                                |                                     |                           |                                       |                             |                                              |                                          |                            |                        |
| Suriname                             | /                                                          |                                       |                           |                                                |                                     |                           |                                       |                             |                                              | /                                        |                            |                        |
| Thailand                             | /                                                          | /                                     |                           | /                                              | /                                   |                           | /                                     |                             |                                              | /                                        |                            |                        |
| Tonga                                | /                                                          |                                       |                           |                                                |                                     |                           |                                       |                             |                                              |                                          |                            |                        |
| Turkey                               |                                                            | /                                     | /                         | /                                              |                                     | /                         |                                       |                             |                                              | /                                        |                            |                        |
| Tuvalu                               | /                                                          |                                       |                           |                                                |                                     |                           |                                       |                             |                                              |                                          |                            |                        |
| Venezuela                            | /                                                          |                                       |                           |                                                | /                                   |                           |                                       |                             |                                              | /                                        |                            |                        |
| <b>Lower middle-income countries</b> |                                                            |                                       |                           |                                                |                                     |                           |                                       |                             |                                              |                                          |                            |                        |
| Algeria                              | /                                                          |                                       |                           |                                                |                                     |                           |                                       |                             |                                              |                                          |                            |                        |
| Angola                               | /                                                          |                                       |                           |                                                |                                     |                           |                                       |                             |                                              |                                          |                            |                        |



| Country         | Standard pharmaceutical reimbursement and pricing policies |                                       |                           | Funding strategies specific to high-cost drugs |                                     |                           |                                       |                             | Financial assistance for individual patients |                                          |                            |                        |
|-----------------|------------------------------------------------------------|---------------------------------------|---------------------------|------------------------------------------------|-------------------------------------|---------------------------|---------------------------------------|-----------------------------|----------------------------------------------|------------------------------------------|----------------------------|------------------------|
|                 | WHO List of essential medicines                            | National Health Technology Assessment | Reference pricing systems | Managed entry agreement                        | Dedicated funds for high-cost drugs | Orphan drug reimbursement | Adjusted cost-effectiveness threshold | Use of compulsory licensing | Health insurance scheme for the poor         | Patient cost-sharing reduction/exemption | Patient Assistance Program | Assistance Foundations |
| Bangladesh      | /                                                          |                                       |                           |                                                |                                     |                           |                                       |                             |                                              | /                                        |                            |                        |
| Benin           |                                                            |                                       |                           |                                                |                                     |                           |                                       |                             |                                              | /                                        |                            |                        |
| Bhutan          | /                                                          |                                       |                           |                                                |                                     |                           |                                       |                             |                                              | /                                        |                            |                        |
| Bolivia         | /                                                          |                                       |                           |                                                |                                     |                           |                                       |                             |                                              | /                                        |                            |                        |
| Cabo Verde      | /                                                          |                                       |                           |                                                |                                     |                           |                                       |                             |                                              | /                                        |                            |                        |
| Cambodia        | /                                                          |                                       |                           |                                                |                                     |                           |                                       |                             |                                              | /                                        |                            |                        |
| Cameroon        | /                                                          |                                       |                           |                                                |                                     |                           |                                       |                             |                                              | /                                        |                            |                        |
| Congo, Republic | /                                                          |                                       |                           |                                                |                                     |                           |                                       |                             |                                              | /                                        |                            |                        |
| Côte d'Ivoire   | /                                                          |                                       |                           |                                                |                                     |                           |                                       |                             |                                              | /                                        |                            |                        |
| Djibouti        | /                                                          |                                       |                           |                                                |                                     |                           |                                       |                             |                                              |                                          |                            |                        |
| Egypt           | /                                                          |                                       |                           |                                                |                                     |                           |                                       |                             |                                              |                                          |                            |                        |
| El Salvador     | /                                                          |                                       |                           |                                                |                                     |                           |                                       |                             |                                              | /                                        |                            |                        |
| Ghana           | /                                                          |                                       |                           |                                                |                                     |                           |                                       |                             |                                              | /                                        | /                          |                        |
| Honduras        | /                                                          |                                       |                           |                                                |                                     |                           |                                       |                             |                                              | /                                        |                            |                        |
| India           | /                                                          | /                                     |                           |                                                |                                     |                           |                                       | /                           | /                                            | /                                        |                            |                        |

| Country    | Standard pharmaceutical reimbursement and pricing policies |                                       |                           | Funding strategies specific to high-cost drugs |                                     |                           |                                       |                             | Financial assistance for individual patients |                                          |                            |                        |
|------------|------------------------------------------------------------|---------------------------------------|---------------------------|------------------------------------------------|-------------------------------------|---------------------------|---------------------------------------|-----------------------------|----------------------------------------------|------------------------------------------|----------------------------|------------------------|
|            | WHO List of essential medicines                            | National Health Technology Assessment | Reference pricing systems | Managed entry agreement                        | Dedicated funds for high-cost drugs | Orphan drug reimbursement | Adjusted cost-effectiveness threshold | Use of compulsory licensing | Health insurance scheme for the poor         | Patient cost-sharing reduction/exemption | Patient Assistance Program | Assistance Foundations |
| Kenya      | /                                                          |                                       |                           |                                                |                                     |                           |                                       |                             |                                              | /                                        |                            |                        |
| Kyrgyzstan | /                                                          |                                       | /                         |                                                |                                     |                           |                                       |                             |                                              | /                                        |                            |                        |
| Kiribati   | /                                                          |                                       |                           |                                                |                                     |                           |                                       |                             |                                              |                                          |                            |                        |
| Laos       |                                                            |                                       |                           |                                                |                                     |                           |                                       |                             |                                              | /                                        |                            |                        |
| Lesotho    | /                                                          |                                       |                           |                                                |                                     |                           |                                       |                             |                                              | /                                        |                            |                        |
| Liberia    | /                                                          |                                       |                           |                                                |                                     |                           |                                       |                             |                                              |                                          |                            |                        |
| Mauritania | /                                                          |                                       |                           |                                                |                                     |                           |                                       |                             |                                              | /                                        |                            |                        |
| Moldova    | /                                                          |                                       |                           |                                                |                                     |                           |                                       |                             |                                              | /                                        |                            |                        |
| Mongolia   | /                                                          |                                       |                           |                                                |                                     |                           |                                       |                             |                                              | /                                        |                            |                        |
| Morocco    | /                                                          |                                       |                           |                                                |                                     |                           |                                       |                             |                                              | /                                        |                            |                        |
| Myanmar    | /                                                          |                                       |                           |                                                |                                     |                           |                                       |                             |                                              |                                          |                            |                        |
| Nepal      | /                                                          |                                       |                           |                                                |                                     |                           |                                       |                             |                                              | /                                        |                            |                        |
| Nicaragua  | /                                                          |                                       |                           |                                                |                                     |                           |                                       |                             |                                              | /                                        |                            |                        |
| Nigeria    | /                                                          |                                       |                           |                                                |                                     |                           |                                       |                             |                                              | /                                        |                            |                        |
| Pakistan   | /                                                          |                                       |                           |                                                |                                     |                           |                                       |                             |                                              | /                                        |                            |                        |

| Country          | Standard pharmaceutical reimbursement and pricing policies |                                       |                           | Funding strategies specific to high-cost drugs |                                     |                           |                                       |                             | Financial assistance for individual patients |                                          |                            |                        |
|------------------|------------------------------------------------------------|---------------------------------------|---------------------------|------------------------------------------------|-------------------------------------|---------------------------|---------------------------------------|-----------------------------|----------------------------------------------|------------------------------------------|----------------------------|------------------------|
|                  | WHO List of essential medicines                            | National Health Technology Assessment | Reference pricing systems | Managed entry agreement                        | Dedicated funds for high-cost drugs | Orphan drug reimbursement | Adjusted cost-effectiveness threshold | Use of compulsory licensing | Health insurance scheme for the poor         | Patient cost-sharing reduction/exemption | Patient Assistance Program | Assistance Foundations |
| Papua New Guinea | /                                                          |                                       |                           |                                                |                                     |                           |                                       |                             |                                              | /                                        |                            |                        |
| Philippines      | /                                                          |                                       |                           |                                                |                                     |                           |                                       |                             |                                              | /                                        |                            |                        |
| Senegal          | /                                                          |                                       |                           |                                                |                                     |                           |                                       |                             |                                              | /                                        |                            |                        |
| Solomon Islands  | /                                                          |                                       |                           |                                                |                                     |                           |                                       |                             |                                              | /                                        |                            |                        |
| Sri Lanka        | /                                                          |                                       |                           |                                                |                                     |                           |                                       |                             |                                              | /                                        |                            |                        |
| Swaziland        |                                                            |                                       |                           |                                                |                                     |                           |                                       |                             |                                              | /                                        |                            |                        |
| Tanzania         | /                                                          |                                       |                           |                                                |                                     |                           |                                       |                             |                                              | /                                        |                            |                        |
| Timor-Leste      | /                                                          |                                       |                           |                                                |                                     |                           |                                       |                             |                                              | /                                        |                            |                        |
| Tunisia          | /                                                          |                                       |                           |                                                |                                     |                           |                                       |                             |                                              |                                          |                            |                        |
| Ukraine          | /                                                          | /                                     | /                         |                                                |                                     |                           |                                       |                             |                                              |                                          |                            |                        |
| Uzbekistan       |                                                            | /                                     |                           |                                                |                                     |                           |                                       |                             |                                              | /                                        |                            |                        |
| Vanuatu          | /                                                          |                                       |                           |                                                |                                     |                           |                                       |                             |                                              |                                          |                            |                        |
| Vietnam          | /                                                          | /                                     |                           |                                                |                                     |                           |                                       |                             |                                              | /                                        |                            |                        |
| Zambia           | /                                                          |                                       |                           |                                                |                                     |                           |                                       |                             |                                              | /                                        |                            |                        |
| Zimbabwe         | /                                                          |                                       |                           |                                                |                                     |                           |                                       |                             |                                              | /                                        |                            |                        |

| Country                     | Standard pharmaceutical reimbursement and pricing policies |                                       |                           | Funding strategies specific to high-cost drugs |                                     |                           |                                       |                             | Financial assistance for individual patients |                                          |                            |                        |
|-----------------------------|------------------------------------------------------------|---------------------------------------|---------------------------|------------------------------------------------|-------------------------------------|---------------------------|---------------------------------------|-----------------------------|----------------------------------------------|------------------------------------------|----------------------------|------------------------|
|                             | WHO List of essential medicines                            | National Health Technology Assessment | Reference pricing systems | Managed entry agreement                        | Dedicated funds for high-cost drugs | Orphan drug reimbursement | Adjusted cost-effectiveness threshold | Use of compulsory licensing | Health insurance scheme for the poor         | Patient cost-sharing reduction/exemption | Patient Assistance Program | Assistance Foundations |
| <b>Low-income countries</b> |                                                            |                                       |                           |                                                |                                     |                           |                                       |                             |                                              |                                          |                            |                        |
| Afghanistan                 | /                                                          |                                       |                           |                                                |                                     |                           |                                       |                             |                                              |                                          |                            |                        |
| Burkina Faso                | /                                                          |                                       |                           |                                                |                                     |                           |                                       |                             |                                              | /                                        |                            |                        |
| Burundi                     | /                                                          |                                       |                           |                                                |                                     |                           |                                       |                             |                                              |                                          |                            |                        |
| Central African Republic    | /                                                          |                                       |                           |                                                |                                     |                           |                                       |                             |                                              | /                                        |                            |                        |
| Chad                        | /                                                          |                                       |                           |                                                |                                     |                           |                                       |                             |                                              |                                          |                            |                        |
| Congo, Democratic Republic  | /                                                          |                                       |                           |                                                |                                     |                           |                                       |                             |                                              | /                                        |                            |                        |
| Eritrea                     | /                                                          |                                       |                           |                                                |                                     |                           |                                       |                             |                                              |                                          |                            |                        |
| Ethiopia                    | /                                                          |                                       |                           |                                                |                                     |                           |                                       |                             |                                              | /                                        |                            |                        |
| Gambia                      | /                                                          |                                       |                           |                                                |                                     |                           |                                       |                             |                                              |                                          |                            |                        |
| Guinea                      | /                                                          |                                       |                           |                                                |                                     |                           |                                       |                             |                                              | /                                        |                            |                        |
| Haiti                       | /                                                          |                                       |                           |                                                |                                     |                           |                                       |                             |                                              | /                                        |                            |                        |
| North Korea                 | /                                                          |                                       |                           |                                                |                                     |                           |                                       |                             |                                              |                                          |                            |                        |
| Madagascar                  | /                                                          |                                       |                           |                                                |                                     |                           |                                       |                             |                                              | /                                        |                            |                        |
| Malawi                      | /                                                          |                                       |                           |                                                |                                     |                           |                                       |                             |                                              | /                                        |                            |                        |

| Country              | Standard pharmaceutical reimbursement and pricing policies |                                       |                           | Funding strategies specific to high-cost drugs |                                     |                           |                                       |                             | Financial assistance for individual patients |                                          |                            |                        |
|----------------------|------------------------------------------------------------|---------------------------------------|---------------------------|------------------------------------------------|-------------------------------------|---------------------------|---------------------------------------|-----------------------------|----------------------------------------------|------------------------------------------|----------------------------|------------------------|
|                      | WHO List of essential medicines                            | National Health Technology Assessment | Reference pricing systems | Managed entry agreement                        | Dedicated funds for high-cost drugs | Orphan drug reimbursement | Adjusted cost-effectiveness threshold | Use of compulsory licensing | Health insurance scheme for the poor         | Patient cost-sharing reduction/exemption | Patient Assistance Program | Assistance Foundations |
| Mali                 | /                                                          |                                       |                           |                                                |                                     |                           |                                       |                             |                                              | /                                        |                            |                        |
| Mozambique           | /                                                          |                                       |                           |                                                |                                     |                           |                                       |                             |                                              | /                                        |                            |                        |
| Niger                |                                                            |                                       |                           |                                                |                                     |                           |                                       |                             |                                              | /                                        |                            |                        |
| Rwanda               | /                                                          |                                       |                           |                                                |                                     |                           |                                       |                             |                                              | /                                        |                            |                        |
| Sierra Leone         |                                                            |                                       |                           |                                                |                                     |                           |                                       |                             |                                              | /                                        |                            |                        |
| Somalia              | /                                                          |                                       |                           |                                                |                                     |                           |                                       |                             |                                              |                                          |                            |                        |
| Sudan                | /                                                          |                                       |                           |                                                |                                     |                           |                                       |                             |                                              | /                                        |                            |                        |
| Syrian Arab Republic | /                                                          |                                       |                           |                                                |                                     |                           |                                       |                             |                                              |                                          |                            |                        |
| Tajikistan           | /                                                          |                                       |                           |                                                |                                     |                           |                                       |                             |                                              | /                                        |                            |                        |
| Togo                 | /                                                          |                                       |                           |                                                |                                     |                           |                                       |                             |                                              | /                                        |                            |                        |
| Uganda               | /                                                          |                                       |                           |                                                |                                     |                           |                                       |                             |                                              | /                                        |                            |                        |
| Yemen                | /                                                          |                                       |                           |                                                |                                     |                           |                                       |                             |                                              |                                          |                            |                        |
